# Supplementary material
Source: PubMed Central journal article supplement (PMC7255525)
Supplement: PRO-29-1486-s005.pdf [file PRO-29-1486-s005.pdf]

**Supplementary Table S3  
Exocyst Phosphorylation Sites**

| <b>Sec3</b> | <b>Sec5</b> | <b>Sec6</b> | <b>Sec8</b> | <b>Sec10</b> | <b>Sec15</b> | <b>Exo70</b> | <b>Exo84</b> |
|-------------|-------------|-------------|-------------|--------------|--------------|--------------|--------------|
| S32         | S184        | n/a         | S16         | S142         | S286         | n/a          | T28          |
| S35         |             |             | S19         | S485         | S894         |              | S31          |
| S43         |             |             | S21         | S507         |              |              | T52          |
| S69         |             |             | T23         |              |              |              | T55          |
| S71         |             |             |             |              |              |              | S130         |
| S72         |             |             |             |              |              |              | S134         |
| T74         |             |             |             |              |              |              | T135         |
| S75         |             |             |             |              |              |              | S139         |
| S254        |             |             |             |              |              |              | S143         |
| S256        |             |             |             |              |              |              | S287         |
| S263        |             |             |             |              |              |              | S291         |
| T275        |             |             |             |              |              |              | T474         |
| S279        |             |             |             |              |              |              | S482         |
| T280        |             |             |             |              |              |              | S490         |
| S297        |             |             |             |              |              |              | T496         |
| S301        |             |             |             |              |              |              | S597         |
| S317        |             |             |             |              |              |              | S716         |
| S318        |             |             |             |              |              |              |              |
| S320        |             |             |             |              |              |              |              |
| T321        |             |             |             |              |              |              |              |
| S464        |             |             |             |              |              |              |              |
| Y465        |             |             |             |              |              |              |              |
| S548        |             |             |             |              |              |              |              |
| S606        |             |             |             |              |              |              |              |
